# Supplementary material for: The Impact of Ethnicity on Athlete ECG Interpretation: A Systematic Review
Source: MDPI journal article supplement (doi:10.3390/jcdd9060183), 2022-06-08
Supplement: s1 [file s1]

## Supplementary Material

### Supplementary Appendix SA: Search terms

#### MEDLINE

| #  | Searches                                       |
|----|------------------------------------------------|
| 1  | exp Athletes/                                  |
| 2  | athlete*.mp.                                   |
| 3  | player*.mp.                                    |
| 4  | sportsmen.mp.                                  |
| 5  | sportsperson.mp.                               |
| 6  | sportswomen.mp.                                |
| 7  | 1 or 3 or 4 or 6                               |
| 8  | Ethnic Groups/                                 |
| 9  | African American/                              |
| 10 | African American*.mp.                          |
| 11 | Arabs/                                         |
| 12 | Arab*.mp.                                      |
| 13 | Asian Americans/                               |
| 14 | Asian American*.mp.                            |
| 15 | Indigenous peoples/                            |
| 16 | (Indigenous or Aborigin* or first nation*).mp. |
| 17 | exp Continental Population Groups/             |
| 18 | race.mp.                                       |
| 19 | origin.mp.                                     |
| 20 | Hispanic Americans/                            |
| 21 | Hispanic American*.mp.                         |
| 22 | exp African Continental Ancestry Group/        |
| 23 | (African American* or Afro-Caribbean*).mp.     |
| 24 | Mixed-race.mp.                                 |
| 25 | Oceanic Ancestry Group/                        |
| 26 | Pacific Islander*.mp.                          |
| 27 | Oceanic Ancestry Group*.mp.                    |
| 28 | exp Asian Continental Ancestry Group/          |
| 29 | Asian Continental Ancestry Group*.mp.          |

|    |                                                                                                                                            |
|----|--------------------------------------------------------------------------------------------------------------------------------------------|
| 30 | South Asian ethnic group*.mp.                                                                                                              |
| 31 | Ethnic*.mp.                                                                                                                                |
| 32 | 8 or 9 or 10 or 11 or 12 or 13 or 14 or 15 or 16 or 17 or 18 or 19 or 20 or 21 or 22 or 23 or 24 or 25 or 26 or 27 or 28 or 29 or 30 or 31 |
| 33 | Electrocardiography/                                                                                                                       |
| 34 | Electrocardiogra*.mp.                                                                                                                      |
| 35 | ECG.tw.                                                                                                                                    |
| 36 | EKG.tw.                                                                                                                                    |
| 37 | 33 or 34 or 35 or 36                                                                                                                       |
| 38 | 7 and 32 and 37                                                                                                                            |

## EMBASE

| #  | Searches                                            |
|----|-----------------------------------------------------|
| 1  | elite athlete/ or athlete/ or professional athlete/ |
| 2  | athlete*.mp.                                        |
| 3  | player*.mp.                                         |
| 4  | sportsmen*.mp.                                      |
| 5  | sportsperson*.mp.                                   |
| 6  | sportswomen.mp.                                     |
| 7  | 1 or 2 or 3 or 4 or 5 or 6                          |
| 8  | ethnic group/                                       |
| 9  | ethnic*.mp.                                         |
| 10 | population group/                                   |
| 11 | African American/                                   |
| 12 | African American*.mp.                               |
| 13 | asian continental ancestry group/                   |
| 14 | asian/                                              |
| 15 | african/                                            |
| 16 | asain*.mp.                                          |
| 17 | african*.mp.                                        |
| 18 | indigenous people/                                  |
| 19 | aboriginal*.mp.                                     |
| 20 | exp oceanic ancestry group/                         |

|    |                                                                                      |
|----|--------------------------------------------------------------------------------------|
| 21 | exp african caribbean/                                                               |
| 22 | exp Black person/                                                                    |
| 23 | 8 or 9 or 10 or 11 or 12 or 13 or 14 or 15 or 16 or 17 or 18 or 19 or 20 or 21 or 22 |
| 24 | electrocardiography/                                                                 |
| 25 | electrocardiogra*.mp.                                                                |
| 26 | ECG.tw.                                                                              |
| 27 | EKG.tw.                                                                              |
| 28 | 24 or 25 or 26 or 27                                                                 |
| 29 | 7 and 23 and 28                                                                      |

## Scopus

( TITLE-ABS-

KEY ( athlete\* OR player\* OR sportsmen OR sportswomen OR sportsperson ) AND TITLE-ABS-

KEY ( ethnic\* OR "african american\*" OR arab\* OR "asian

american\*" OR indigenous OR aborigin\* OR "first nation\*" OR race OR origin OR "hispanic

american\*" OR "african american\*" OR "afro-caribbean\*" OR "mixed-race" OR "pacific

islander\*" OR "oceanic ancestry group" OR "asian continental ancestry group" OR "south asian ethnic group" ) AND TITLE-ABS-KEY ( electrocardiogra\* OR ecg OR ekg ) )

## SPORTSDiscus

(athlete\* OR player\* OR sportsmen OR sportswomen OR sportsperson ) AND ( ethnic\* OR "african american\*" OR arab\* OR "asian american\*" OR indigenous OR aborigin\* OR "first nation\*" OR race OR origin OR "hispanic american\*" OR "african american\*" OR "afro-caribbean\*" OR "Mixed-race" OR "Pacific Islander\*" OR "oceanic ancestry group" OR "asian continental ancestry group" OR "south asian ethnic group" ) AND ( electrocariogra\* OR ecg OR ekg )

## Web of Science

(athlete\* OR player\* OR sportsmen OR sportswomen OR sportsperson ) AND ( ethnic\* OR "african american\*" OR arab\* OR "asian american\*" OR indigenous OR aborigin\* OR "first nation\*" OR race OR origin OR "hispanic american\*" OR "african american\*" OR "afro-caribbean\*" OR "Mixed-race" OR "Pacific Islander\*" OR "oceanic ancestry group" OR "asian continental ancestry group" OR "south asian ethnic group" ) AND ( electrocariogra\* OR ecg OR ekg )

Supplementary Appendix SB: Quality assessment

| Study ID     | 1   | 2   | 3   | 4   | 5  | 6  | 7  | 8  | 9   | 10 | 11  | 12 | 13 | 14  | Final assessment |
|--------------|-----|-----|-----|-----|----|----|----|----|-----|----|-----|----|----|-----|------------------|
| Ma 2006      | Yes | Yes | Yes | Yes | No | No | No | NA | Yes | No | Yes | NA | NA | Yes | Fair             |
| Zaidi 2013   | Yes | Yes | Yes | Yes | No | No | No | NA | Yes | No | Yes | NA | NA | Yes | Fair             |
| Wilson 2012  | Yes | Yes | Yes | Yes | No | No | No | NA | Yes | No | Yes | NA | NA | Yes | Fair             |
| Waase 2018   | Yes | Yes | Yes | Yes | No | No | No | NA | Yes | No | Yes | NA | NA | Yes | Fair             |
| Uberoi 2013  | Yes | Yes | Yes | Yes | No | No | No | NA | Yes | No | Yes | NA | NA | Yes | Fair             |
| Sokunbi 2021 | Yes | Yes | Yes | Yes | No | No | No | NA | Yes | No | Yes | NA | NA | Yes | Fair             |
| Sheikh 2014  | Yes | Yes | Yes | Yes | No | No | No | NA | Yes | No | Yes | NA | NA | Yes | Fair             |
| Sheikh 2013  | Yes | Yes | Yes | Yes | No | No | No | NA | Yes | No | Yes | NA | NA | Yes | Fair             |
| Schmied 2009 | Yes | Yes | Yes | Yes | No | No | No | NA | Yes | No | Yes | NA | NA | Yes | Fair             |
| Schmied 2013 | Yes | Yes | Yes | Yes | No | No | No | NA | Yes | No | Yes | NA | NA | Yes | Fair             |
| Riding 2015  | Yes | Yes | Yes | Yes | No | No | No | NA | Yes | No | Yes | NA | NA | Yes | Fair             |
| Riding 2019  | Yes | Yes | Yes | Yes | No | No | No | NA | Yes | No | Yes | NA | NA | Yes | Fair             |
| Riding 2014  | Yes | Yes | Yes | Yes | No | No | No | NA | Yes | No | Yes | NA | NA | Yes | Fair             |
| Rawlins 2010 | Yes | Yes | Yes | Yes | No | No | No | NA | Yes | No | Yes | NA | NA | Yes | Fair             |

|                        |     |     |     |     |    |    |    |    |     |    |     |    |    |     |      |
|------------------------|-----|-----|-----|-----|----|----|----|----|-----|----|-----|----|----|-----|------|
| Rambara<br>rat<br>2021 | Yes | Yes | Yes | Yes | No | No | No | NA | Yes | No | Yes | NA | NA | Yes | Fair |
| Papadakis<br>2011      | Yes | Yes | Yes | Yes | No | No | No | NA | Yes | No | Yes | NA | NA | Yes | Fair |
| Pambo<br>2020          | Yes | Yes | Yes | Yes | No | No | No | NA | Yes | No | Yes | NA | NA | Yes | Fair |
| Pambo<br>2019          | Yes | Yes | Yes | Yes | No | No | No | NA | Yes | No | Yes | NA | NA | Yes | Fair |
| Noseworthy<br>2011     | Yes | Yes | Yes | Yes | No | No | No | NA | Yes | No | Yes | NA | NA | Yes | Fair |
| Muramoto<br>2014       | Yes | Yes | Yes | Yes | No | No | No | NA | Yes | No | Yes | NA | NA | Yes | Fair |
| Muramoto<br>2013       | Yes | Yes | Yes | Yes | No | No | No | NA | Yes | No | Yes | NA | NA | Yes | Fair |
| Miragoli<br>2019       | Yes | Yes | Yes | Yes | No | No | No | NA | Yes | No | Yes | NA | NA | Yes | Fair |
| McClellan<br>2019      | Yes | Yes | Yes | Yes | No | No | No | NA | Yes | No | Yes | NA | NA | Yes | Fair |
| McClellan<br>2019      | Yes | Yes | Yes | Yes | No | No | No | NA | Yes | No | Yes | NA | NA | Yes | Fair |
| Malhotra<br>2021       | Yes | Yes | Yes | Yes | No | No | No | NA | Yes | No | Yes | NA | NA | Yes | Fair |
| Malhotra<br>2020       | Yes | Yes | Yes | Yes | No | No | No | NA | Yes | No | Yes | NA | NA | Yes | Fair |

|                |     |     |     |     |    |    |    |    |     |    |     |    |    |     |      |
|----------------|-----|-----|-----|-----|----|----|----|----|-----|----|-----|----|----|-----|------|
| Maillot 2018   | Yes | Yes | Yes | Yes | No | No | No | NA | Yes | No | Yes | NA | NA | Yes | Fair |
| Magals ki 2011 | Yes | Yes | Yes | Yes | No | No | No | NA | Yes | No | Yes | NA | NA | Yes | Fair |
| Magals ki 2008 | Yes | Yes | Yes | Yes | No | No | No | NA | Yes | No | Yes | NA | NA | Yes | Fair |
| Luijckx 2012   | Yes | Yes | Yes | Yes | No | No | No | NA | Yes | No | Yes | NA | NA | Yes | Fair |
| Leo 2011       | Yes | Yes | Yes | Yes | No | No | No | NA | Yes | No | Yes | NA | NA | Yes | Fair |
| Kervio 2013    | Yes | Yes | Yes | Yes | No | No | No | NA | Yes | No | Yes | NA | NA | Yes | Fair |
| Junntila 2011  | Yes | Yes | Yes | Yes | No | No | No | NA | Yes | No | Yes | NA | NA | Yes | Fair |
| Jacob 2015     | Yes | Yes | Yes | Yes | No | No | No | NA | Yes | No | Yes | NA | NA | Yes | Fair |
| Ilodibi a 2021 | Yes | Yes | Yes | Yes | No | No | No | NA | Yes | No | Yes | NA | NA | Yes | Fair |
| Haddad 2013    | Yes | Yes | Yes | Yes | No | No | No | NA | Yes | No | Yes | NA | NA | Yes | Fair |
| Grace 2015     | Yes | Yes | Yes | Yes | No | No | No | NA | Yes | No | Yes | NA | NA | Yes | Fair |
| Fuller 2016    | Yes | Yes | Yes | Yes | No | No | No | NA | Yes | No | Yes | NA | NA | Yes | Fair |
| DiPaolo 2012   | Yes | Yes | Yes | Yes | No | No | No | NA | Yes | No | Yes | NA | NA | Yes | Fair |
| Dhutia 2016    | Yes | Yes | Yes | Yes | No | No | No | NA | Yes | No | Yes | NA | NA | Yes | Fair |
| Crouse 2009    | Yes | Yes | Yes | Yes | No | No | No | NA | Yes | No | Yes | NA | NA | Yes | Fair |
| Chatard 2019   | Yes | Yes | Yes | Yes | No | No | No | NA | Yes | No | Yes | NA | NA | Yes | Fair |

|                           |     |     |     |     |    |    |    |    |     |    |     |    |    |     |      |
|---------------------------|-----|-----|-----|-----|----|----|----|----|-----|----|-----|----|----|-----|------|
| Brosna<br>n 2015          | Yes | Yes | Yes | Yes | No | No | No | NA | Yes | No | Yes | NA | NA | Yes | Fair |
| Basava<br>rajaiah<br>2008 | Yes | Yes | Yes | Yes | No | No | No | NA | Yes | No | Yes | NA | NA | Yes | Fair |
| Alattar<br>2014           | Yes | Yes | Yes | Yes | No | No | No | NA | Yes | No | Yes | NA | NA | Yes | Fair |
| AbuBa<br>kar<br>2018      | Yes | Yes | Yes | Yes | No | No | No | NA | Yes | No | Yes | NA | NA | Yes | Fair |
| Calore<br>2016            | Yes | Yes | Yes | Yes | No | No | No | NA | Yes | No | Yes | NA | NA | Yes | Fair |
| Yeo<br>2022               | Yes | Yes | Yes | Yes | No | No | No | NA | Yes | No | Yes | NA | NA | Yes | Fair |

Key:

Question 1: Was the research question or objective in this paper clearly stated?

Question 2: Was the study population clearly specified and defined?

Question 3: Was the participation rate of eligible persons at least 50%?

Question 4: Were all the subjects selected or recruited from the same or similar populations (including the same time period)? Were inclusion and exclusion criteria for being in the study prespecified and applied uniformly to all participants?

Question 5: Was a sample size justification, power description, or variance and effect estimates provided?

Question 6: For the analyses in this paper, were the exposure(s) of interest measured prior to the outcome(s) being measured?

Question 7: Was the timeframe sufficient so that one could reasonably expect to see an association between exposure and outcome if it existed?

Question 8: For exposures that can vary in amount or level, did the study examine different levels of the exposure as related to the outcome (e.g., categories of exposure, or exposure measured as continuous variable)?

Question 9: Were the exposure measures (independent variables) clearly defined, valid, reliable, and implemented consistently across all study participants?

Question 10: Was the exposure(s) assessed more than once over time?

Question 11: Were the outcome measures (dependent variables) clearly defined, valid, reliable, and implemented consistently across all study participants?

Question 12: Were the outcome assessors blinded to the exposure status of participants?

Question 13: Was loss to follow-up after baseline 20% or less?

Question 14: Were key potential confounding variables measured and adjusted statistically for their impact on the relationship between exposure(s) and outcome(s)?

NA: Not applicable



# Supplementary Tables

**Supplementary Table S1: Study details**

| Study ID     | Country                 | Ethnicities included                                                 | No. of athlete participants | Mean age (age range)                                             | Male %                       |
|--------------|-------------------------|----------------------------------------------------------------------|-----------------------------|------------------------------------------------------------------|------------------------------|
| Ma 2006      | Other: China            | Han Chinese                                                          | 351                         | 13-34                                                            | 48.4                         |
| Zaidi 2013   | UK                      | Black and Caucasian                                                  | 675                         | Black 21.8 SD 5.4<br>Caucasian 21.7 SD 4.6                       | Black 81<br>Caucasian 80.3   |
| Wilson 2012  | Other: Qatar            | West Asian<br>Black<br>Caucasian                                     | 1220                        | 22.6 SD 6                                                        | 100                          |
| Waase 2018   | USA                     | African American<br>Caucasian                                        | 519                         | 24.8 SD 4.3                                                      | 100                          |
| Uberoi 2013  | USA                     | African American<br>Caucasian                                        | 85                          | Given by position                                                | 100                          |
| Sokunbi 2021 | Other:<br>Nigeria       | Nigerian                                                             | 180                         | 14.46 SD 1.76                                                    | 60                           |
| Sheikh 2014  | UK                      | Black and Caucasian                                                  | 5505                        | Black 22.2 SD 5.7<br>Caucasian 19.3 SD 5.4                       | Black 85.8<br>Caucasian 76.8 |
| Sheikh 2013  | Other: UK<br>and France | Black and Caucasian                                                  | 1232                        | 16.4 SD 1.3                                                      | Black 74.5<br>Caucasian 81.4 |
| Schmied 2009 | Other:<br>Alergia       | African ethnic groups:<br>Bantu<br>Semitic-Hamitic<br>Mande<br>Mixed | 155                         | 16.4 SD 0.68                                                     | 100                          |
| Schmied 2013 | Other:<br>Gabon         | West African                                                         | 210                         | 18.6                                                             | 100                          |
| Riding 2015  | Other: Qatar            | Arabic<br>Black<br>Caucasian                                         | 2491                        | Arabic 21.3 SD 5.4<br>Black 24.1 SD 5.0<br>Caucasian 24.3 SD 5.4 | 100                          |
| Riding 2019  | Other: Qatar            | Black (African-<br>American/Caribbean,                               | 1698                        | African-American/Caribbean<br>27.8 SD 2.9                        | 100                          |

|                 |                      |                                                                                                                                  |      |                                                                                                                                                                                                        |      |
|-----------------|----------------------|----------------------------------------------------------------------------------------------------------------------------------|------|--------------------------------------------------------------------------------------------------------------------------------------------------------------------------------------------------------|------|
|                 |                      | East African, Middle African, West African, South Americans)<br>Arabic (North African, West Asian)<br>Caucasian (South European) |      | East African 24.2 SD 4.9<br>Middle African 25.4 SD 4.5<br>West African 23.8 SD 4.5<br>South Americans 26.6 SD 4.5<br>North African 23.7 SD 5.3<br>West Asian 23.8 SD 4.9<br>South European 25.8 SD 5.3 |      |
| Riding 2014     | Other: Qatar         | Arabic, Black African, Caucasian                                                                                                 | 1175 | Arabic 22.7 SD 5.9<br>Black African 24.6 SD 4.7<br>Caucasian 24.4 SD 5.4                                                                                                                               | 100  |
| Rawlins 2010    | Other: UK and France | Black and Caucasian                                                                                                              | 440  | Black 21 SD 4.6<br>Caucasian 20 SD 4.0                                                                                                                                                                 | 0    |
| Rambarat 2021   | USA                  | Black and Caucasian                                                                                                              | 329  | 18.68 SD 0.86                                                                                                                                                                                          | 0    |
| Papadakis 2011  | Other: UK and France | Black and Caucasian                                                                                                              | 2723 | Black 22.5 SD 5.0<br>Caucasian 17.4 SD 4.1                                                                                                                                                             | 100  |
| Pambo 2020      | Ghana                | Ghanaian (Black West African)                                                                                                    | 75   | 19.1 SD 3.7                                                                                                                                                                                            | 0    |
| Pambo 2019      | Ghana                | Ghanaian (Black West African)                                                                                                    | 159  | 19.28 SD 2.9                                                                                                                                                                                           | 100  |
| Noseworthy 2011 | USA                  | Caucasian<br>Black<br>Asian<br>Latino                                                                                            | 879  | 18.4 SD 0.8                                                                                                                                                                                            | 62   |
| Muramoto 2014   | USA                  | African American<br>Caucasian                                                                                                    | 1114 | 19.2 SD 1.6                                                                                                                                                                                            | 56.7 |
| Muramoto 2013   | USA                  | African American<br>Caucasian                                                                                                    | 1114 | 19.2 SD 1.6                                                                                                                                                                                            | 56.7 |
| Miragoli 2019   | Other: Italy         | Black<br>Caucasian                                                                                                               | 414  | 13.6 SD 1.8                                                                                                                                                                                            | 72   |
| McClellan 2019  | Other: Qatar         | Arab<br>Black                                                                                                                    | 1304 | Arab 15.9 SD 2.0<br>Black 15.2 SD 1.9                                                                                                                                                                  | 100  |

|                |                            |                                                                       |       |                                            |      |
|----------------|----------------------------|-----------------------------------------------------------------------|-------|--------------------------------------------|------|
| McClellan 2019 | Other: Qatar               | Arab<br>Black                                                         | 732   | 11-18                                      | 100  |
| Malhotra 2021  | UK                         | Mixed race (Black and<br>Caucasian parents)<br>Caucasian<br>Black     | 3000  | 16.4 SD 1.3                                | 100  |
| Malhotra 2020  | UK                         | Caucasian<br>Black                                                    | 11168 | Caucasian 16.4 SD 1.2<br>Black 16.7 SD 1.5 | 95   |
| Maillot 2018   | Other:<br>France           | Caucasian<br>Afro-Caribbean<br>Maghreb                                | 1030  | 20                                         | 80.3 |
| Magalski 2011  | USA                        | Caucasian<br>Black                                                    | 964   | 18-21                                      | 48   |
| Magalski 2008  | USA                        | Black<br>Caucasian<br>Other races                                     | 1959  | 23 SD 0.9                                  | 100  |
| Luijckx 2012   | Other:<br>Netherlands      | Caucasian Sub-Sahara<br>African                                       | 38    | 23                                         | 100  |
| Leo 2011       | USA                        | Caucasian<br>African Americans                                        | 641   | 19.5 SD 1.5                                | 54   |
| Le 2010        | USA                        | Caucasian<br>African American<br>Hispanic<br>Pacific Islanders        | 658   | 20                                         | 54   |
| Kervio 2013    | Other: Japan<br>and France | Japanese<br>West -African Descent<br>"African-Caribbean"<br>Caucasian | 282   | 24.1 SD 4.2                                | 100  |
| Junttila 2011  | USA                        | Caucasian<br>Hispanic<br>African-American<br>Other                    | 503   | 17-24                                      | 51   |

|               |                                   |                                                                                                     |      |                                                                                               |      |
|---------------|-----------------------------------|-----------------------------------------------------------------------------------------------------|------|-----------------------------------------------------------------------------------------------|------|
| Jacob 2015    | USA                               | Caucasian<br>Black<br>Biracial<br>Hispanic<br>Other                                                 | 1755 | Men 18.9 SD 1.3<br>Women 18.4 SD 1.4                                                          | 49   |
| Ilodibia 2021 | Other:<br>Nigeria                 | Nigerian, West African                                                                              | 77   | Male athletes 25.5 SD 3.8<br>Female athletes 23.6 SD 3.1                                      | 55.5 |
| Haddad 2013   | USA                               | Black and Caucasian                                                                                 | 129  | Caucasian 19.8 SD 1.6<br>Black 19.4 SD 1.4                                                    | 100  |
| Grace 2015    | Other: South<br>Africa            | Zulu descent                                                                                        | 45   | Boxers (Endurance (E)) 24 SD 2<br>Bodybuilders (Resistance (C))22 SD 4<br>Control (C) 22 SD 4 | 100  |
| Fuller 2016   | USA                               | Black<br>NonBlack                                                                                   | 874  | <18 to 21+                                                                                    | 55   |
| Drezner 2016  | USA                               | Caucasian<br>African-American<br>Asian<br>Hispanic<br>Pacific Islanders<br>Native American<br>Other | 5258 | 20.1                                                                                          | 55   |
| DiPaolo 2012  | Italy,<br>Switzerland,<br>Algeria | African<br>Caucasian (Italian)                                                                      | 216  | African 15.9 SD 0.7<br>Caucasian 16.5 SD 1.1                                                  | 100  |
| Dhutia 2016   | UK                                | Caucasian, Black                                                                                    | 8939 | 19 SD 5                                                                                       | 72   |
| Crouse 2009   | USA                               | African-American<br>Caucasian                                                                       | 77   | 18 SD 1                                                                                       | 100  |
| Chatard 2019  | Other: New<br>Caledonia           | Pacific Islanders:<br>New Caledonia<br>French Polynesia<br>Fiji                                     | 2281 | 19.4 SD 6.5                                                                                   | 68.7 |

|                       |                                   |                                                                                                                                                                                             |      |                                                            |                          |
|-----------------------|-----------------------------------|---------------------------------------------------------------------------------------------------------------------------------------------------------------------------------------------|------|------------------------------------------------------------|--------------------------|
|                       |                                   | Wallis and Futuna<br>Tonga<br>Tuvalu<br>Vanuatu<br>Papua New Guinea<br>Samoa<br>Cook, Salmon and<br>Palau islands                                                                           |      |                                                            |                          |
| Chandra 2014          | UK                                | Black and Caucasian                                                                                                                                                                         | 4081 | 19.5 SD 5.2                                                | 80.5                     |
| Calore 2016           | Other: Italy<br>and UK            | Black and Caucasian                                                                                                                                                                         | 80   | 21 IQR 1-27                                                | Black 75<br>Caucasian 74 |
| Brosnan 2015          | Australia                         | Described as Non-<br>Caucasian vs<br>Caucasian<br>Non-Caucasian<br>includes Asian,<br>African, Aboriginal<br>Australian, Torres<br>Strait Islander, Pacific<br>Islander, Maori and<br>other | 726  | Non-Caucasian 20.3 SD 3.6<br>Caucasian 19.9 SD 3.9         | 100                      |
| Basavarajaiah<br>2008 | UK                                | Black athlete<br>Afro-Caribbean<br>West African<br>East African<br>Caucasian athlete<br>Black control                                                                                       | 750  | Black athlete 20.5 SD 5.8<br>Caucasian athlete 20.2 SD 4.9 | 100                      |
| Alarittar 2014        | Other:<br>United Arab<br>Emirates | Arabic                                                                                                                                                                                      | 230  | 20.68 SD 5.22                                              | 100                      |
| AbuBakar<br>2018      | Other:<br>Brunei                  | Malay, Chinese,<br>Dusun, Malay-Filipino,                                                                                                                                                   | 100  | 25.2 IQR 9.0                                               | 90                       |

|          |           |                                                                |     |             |    |
|----------|-----------|----------------------------------------------------------------|-----|-------------|----|
|          |           | Malay-Chinese, and<br>Malay-Indian                             |     |             |    |
| Yeo 2022 | Singapore | Chinese, Malay,<br>Indian, Sikh, Indian-<br>Chinese Indonesian | 150 | 26.1 SD 5.7 | 50 |

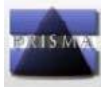

## PRISMA 2020 Checklist

Supplementary Table S2: PRISMA checklist

| Section and Topic             | Item # | Checklist item                                                                                                                                                                                                                                                                                       | Location where item is reported |
|-------------------------------|--------|------------------------------------------------------------------------------------------------------------------------------------------------------------------------------------------------------------------------------------------------------------------------------------------------------|---------------------------------|
| <b>TITLE</b>                  |        |                                                                                                                                                                                                                                                                                                      |                                 |
| Title                         | 1      | Identify the report as a systematic review.                                                                                                                                                                                                                                                          | 1                               |
| <b>ABSTRACT</b>               |        |                                                                                                                                                                                                                                                                                                      |                                 |
| Abstract                      | 2      | See the PRISMA 2020 for Abstracts checklist.                                                                                                                                                                                                                                                         | 2                               |
| <b>INTRODUCTION</b>           |        |                                                                                                                                                                                                                                                                                                      |                                 |
| Rationale                     | 3      | Describe the rationale for the review in the context of existing knowledge.                                                                                                                                                                                                                          | 4                               |
| Objectives                    | 4      | Provide an explicit statement of the objective(s) or question(s) the review addresses.                                                                                                                                                                                                               | 4                               |
| <b>METHODS</b>                |        |                                                                                                                                                                                                                                                                                                      |                                 |
| Eligibility criteria          | 5      | Specify the inclusion and exclusion criteria for the review and how studies were grouped for the syntheses.                                                                                                                                                                                          | 5                               |
| Information sources           | 6      | Specify all databases, registers, websites, organisations, reference lists and other sources searched or consulted to identify studies. Specify the date when each source was last searched or consulted.                                                                                            | 5                               |
| Search strategy               | 7      | Present the full search strategies for all databases, registers and websites, including any filters and limits used.                                                                                                                                                                                 | 26-28                           |
| Selection process             | 8      | Specify the methods used to decide whether a study met the inclusion criteria of the review, including how many reviewers screened each record and each report retrieved, whether they worked independently, and if applicable, details of automation tools used in the process.                     | 5                               |
| Data collection process       | 9      | Specify the methods used to collect data from reports, including how many reviewers collected data from each report, whether they worked independently, any processes for obtaining or confirming data from study investigators, and if applicable, details of automation tools used in the process. | 5                               |
| Data items                    | 10a    | List and define all outcomes for which data were sought. Specify whether all results that were compatible with each outcome domain in each study were sought (e.g. for all measures, time points, analyses), and if not, the methods used to decide which results to collect.                        | 5                               |
|                               | 10b    | List and define all other variables for which data were sought (e.g. participant and intervention characteristics, funding sources). Describe any assumptions made about any missing or unclear information.                                                                                         | 5                               |
| Study risk of bias assessment | 11     | Specify the methods used to assess risk of bias in the included studies, including details of the tool(s) used, how many reviewers assessed each study and whether they worked independently, and if applicable, details of automation tools used in the process.                                    | 5                               |
| Effect measures               | 12     | Specify for each outcome the effect measure(s) (e.g. risk ratio, mean difference) used in the synthesis or presentation of                                                                                                                                                                           | 5                               |

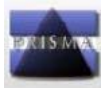

## PRISMA 2020 Checklist

| Section and Topic             | Item # | Checklist item                                                                                                                                                                                                                                              | Location where item is reported |
|-------------------------------|--------|-------------------------------------------------------------------------------------------------------------------------------------------------------------------------------------------------------------------------------------------------------------|---------------------------------|
|                               |        | results.                                                                                                                                                                                                                                                    |                                 |
| Synthesis methods             | 13a    | Describe the processes used to decide which studies were eligible for each synthesis (e.g. tabulating the study intervention characteristics and comparing against the planned groups for each synthesis (item #5)).                                        | 5                               |
|                               | 13b    | Describe any methods required to prepare the data for presentation or synthesis, such as handling of missing summary statistics, or data conversions.                                                                                                       | 5                               |
|                               | 13c    | Describe any methods used to tabulate or visually display results of individual studies and syntheses.                                                                                                                                                      | 5                               |
|                               | 13d    | Describe any methods used to synthesize results and provide a rationale for the choice(s). If meta-analysis was performed, describe the model(s), method(s) to identify the presence and extent of statistical heterogeneity, and software package(s) used. | 5                               |
|                               | 13e    | Describe any methods used to explore possible causes of heterogeneity among study results (e.g. subgroup analysis, meta-regression).                                                                                                                        | 5                               |
|                               | 13f    | Describe any sensitivity analyses conducted to assess robustness of the synthesized results.                                                                                                                                                                | 5                               |
| Reporting bias assessment     | 14     | Describe any methods used to assess risk of bias due to missing results in a synthesis (arising from reporting biases).                                                                                                                                     | 5                               |
| Certainty assessment          | 15     | Describe any methods used to assess certainty (or confidence) in the body of evidence for an outcome.                                                                                                                                                       | 5                               |
| <b>RESULTS</b>                |        |                                                                                                                                                                                                                                                             |                                 |
| Study selection               | 16a    | Describe the results of the search and selection process, from the number of records identified in the search to the number of studies included in the review, ideally using a flow diagram.                                                                | 6                               |
|                               | 16b    | Cite studies that might appear to meet the inclusion criteria, but which were excluded, and explain why they were excluded.                                                                                                                                 | N/A                             |
| Study characteristics         | 17     | Cite each included study and present its characteristics.                                                                                                                                                                                                   | 6                               |
| Risk of bias in studies       | 18     | Present assessments of risk of bias for each included study.                                                                                                                                                                                                | 29-30                           |
| Results of individual studies | 19     | For all outcomes, present, for each study: (a) summary statistics for each group (where appropriate) and (b) an effect estimate and its precision (e.g. confidence/credible interval), ideally using structured tables or plots.                            | 6-17                            |
| Results of syntheses          | 20a    | For each synthesis, briefly summarise the characteristics and risk of bias among contributing studies.                                                                                                                                                      | 6-17                            |
|                               | 20b    | Present results of all statistical syntheses conducted. If meta-analysis was done, present for each the summary estimate and its precision (e.g. confidence/credible interval) and measures of statistical heterogeneity. If comparing groups, describe the | 6-17                            |





## PRISMA 2020 Checklist

| Section and Topic                              | Item # | Checklist item                                                                                                                                                                                                                             | Location where item is reported |
|------------------------------------------------|--------|--------------------------------------------------------------------------------------------------------------------------------------------------------------------------------------------------------------------------------------------|---------------------------------|
|                                                |        | direction of the effect.                                                                                                                                                                                                                   |                                 |
|                                                | 20c    | Present results of all investigations of possible causes of heterogeneity among study results.                                                                                                                                             | 6-17                            |
|                                                | 20d    | Present results of all sensitivity analyses conducted to assess the robustness of the synthesized results.                                                                                                                                 | 6-17                            |
| Reporting biases                               | 21     | Present assessments of risk of bias due to missing results (arising from reporting biases) for each synthesis assessed.                                                                                                                    | 6-17                            |
| Certainty of evidence                          | 22     | Present assessments of certainty (or confidence) in the body of evidence for each outcome assessed.                                                                                                                                        | 6-17                            |
| <b>DISCUSSION</b>                              |        |                                                                                                                                                                                                                                            |                                 |
| Discussion                                     | 23a    | Provide a general interpretation of the results in the context of other evidence.                                                                                                                                                          | 18-20                           |
|                                                | 23b    | Discuss any limitations of the evidence included in the review.                                                                                                                                                                            | 20                              |
|                                                | 23c    | Discuss any limitations of the review processes used.                                                                                                                                                                                      | 20                              |
|                                                | 23d    | Discuss implications of the results for practice, policy, and future research.                                                                                                                                                             | 20                              |
| <b>OTHER INFORMATION</b>                       |        |                                                                                                                                                                                                                                            |                                 |
| Registration and protocol                      | 24a    | Provide registration information for the review, including register name and registration number, or state that the review was not registered.                                                                                             | 5                               |
|                                                | 24b    | Indicate where the review protocol can be accessed, or state that a protocol was not prepared.                                                                                                                                             | 5                               |
|                                                | 24c    | Describe and explain any amendments to information provided at registration or in the protocol.                                                                                                                                            | N/A                             |
| Support                                        | 25     | Describe sources of financial or non-financial support for the review, and the role of the funders or sponsors in the review.                                                                                                              | 20                              |
| Competing interests                            | 26     | Declare any competing interests of review authors.                                                                                                                                                                                         | N/A                             |
| Availability of data, code and other materials | 27     | Report which of the following are publicly available and where they can be found: template data collection forms; data extracted from included studies; data used for all analyses; analytic code; any other materials used in the review. | Supplementary Material          |

From: Page MJ, McKenzie JE, Bossuyt PM, Boutron I, Hoffmann TC, Mulrow CD, et al. The PRISMA 2020 statement: an updated guideline for reporting systematic reviews. BMJ 2021;372:n71. doi: 10.1136/bmj.n71

For more information, visit: <http://www.prisma-statement.org/>
